# Supplementary figures and images for: Factors influencing the kinetics of MSU crystal depletion measured with dual-energy CT in patients with gout
Source: PubMed Central journal article supplement — RMD Open. 2023 Nov 8;9(4):e003725. doi: 10.1136/rmdopen-2023-003725 (PMC10632919; doi:10.1136/rmdopen-2023-003725), 2023-11-08

## Supplementary data

## Supplementary Figure 1. Study flow-chart

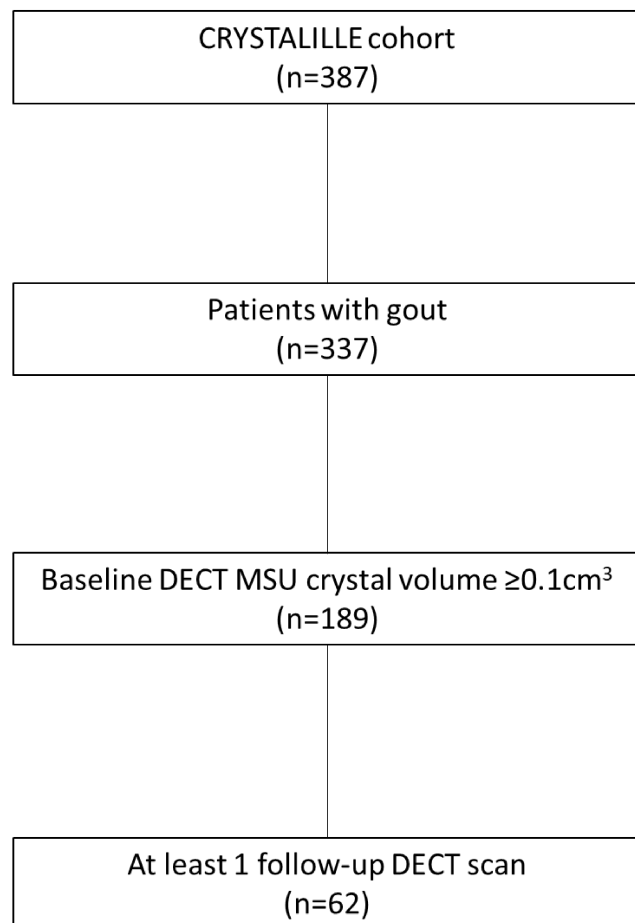

Supplement: rmdopen-2023-003725supp001.pdf [file rmdopen-2023-003725supp001.pdf]
